# Supplementary material
Source: publisher figshare collection journal article supplement (https://tandf.figshare.com/ndownloader/files/31585666)
Supplement: Supplementary file 1 [file 31585666]

**Appendix A**

SYNTHESIS, MOLECULAR DOCKING AND BIOCHEMICAL ANALYSIS OF AMINOALKYLATED NAPHTHALENE-BASED CHALCONES AS ACETYLCHOLINESTERASE INHIBITORS

Ghadah Aljohania¸b, Adeeb Al-Sheikh Alia, Shaya Y. Alraqaa, Syazwani Itri Amranc, Norazah Basarb

**a** Chemistry Department, College of Science, Taibah University, P.O. Box 30002, Code 14177, Al-Madinah Al Munawarah, Kingdom of Saudi Arabia

**b** Department of Chemistry, Faculty of Science, Universiti Teknologi Malaysia, 81310 Johor Bahru, Malaysia

**c** Department of Biosciences, Faculty of Science, Universiti Teknologi Malaysia, 81310 Johor Bahru, Malaysia

**Experimental: Spectral Data**

**Figure S1: 1H NMR spectrum of compound 5**

**Figure S2: 13C NMR and DEPT 135 spectra of compound 5**

**Figure S3: Mass spectrum of compound 5**

**Figure S4: 1H NMR spectrum of compound 6**

|  |  |
| --- | --- |

**Figure S 5: 1H-1H COSY spectrum of compound 6**

|  |  |
| --- | --- |

**Figure S 6: HMQC spectrum of** **compound 6**

**Figure S 7: HMBC spectrum of** **compound 6**

**Figure S8: 13C NMR and DEPT 135 spectra of compound 6**

**Figure S9: Mass spectrum of compound 6**

**Figure S10: 1H NMR spectrum of compound 7**

**Figure S11: 13C NMR and DEPT 135 spectra of compound 7**

**Figure S12: Mass spectrum of compound 7**


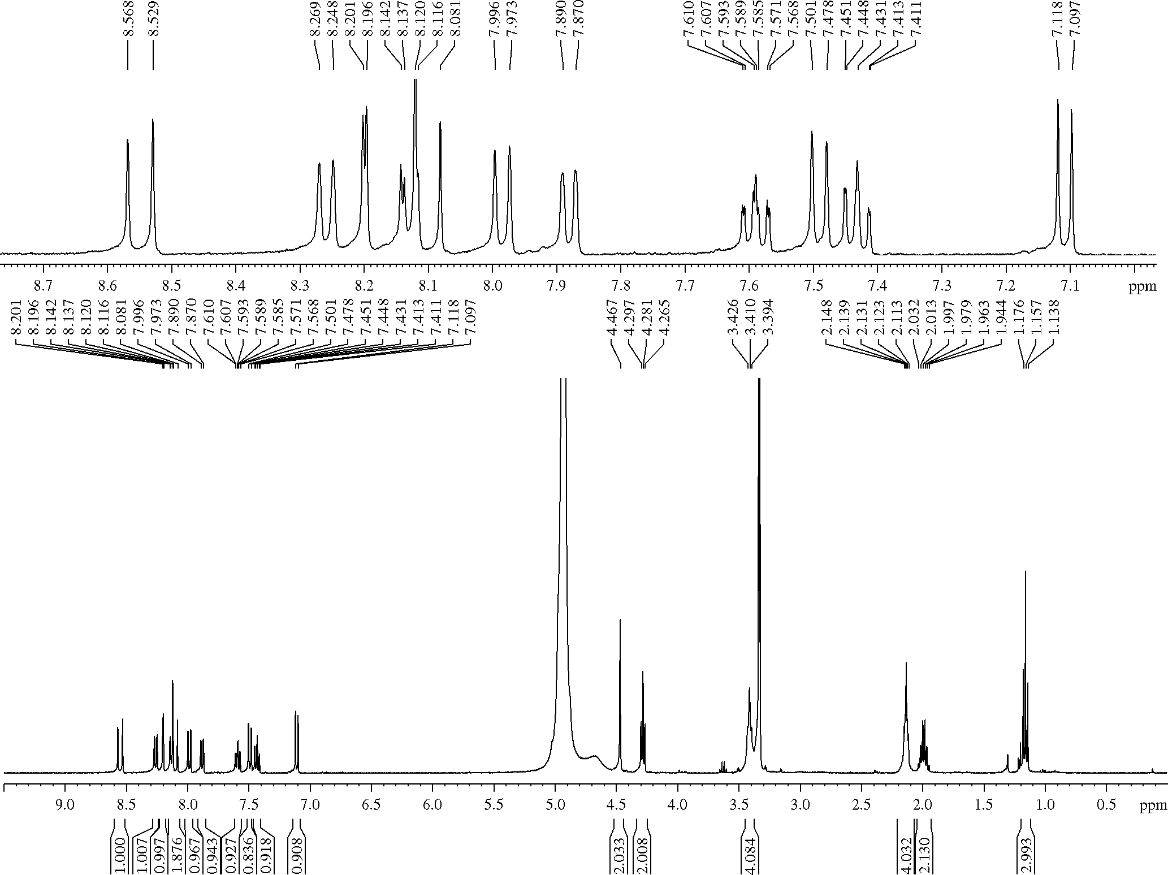


**Figure S13: 1H NMR spectrum of compound 8**

**Figure S14: 13C NMR 13C NMR and DEPT 135 spectra of compound 8**

**Figure S15: Mass spectrum of compound 8**


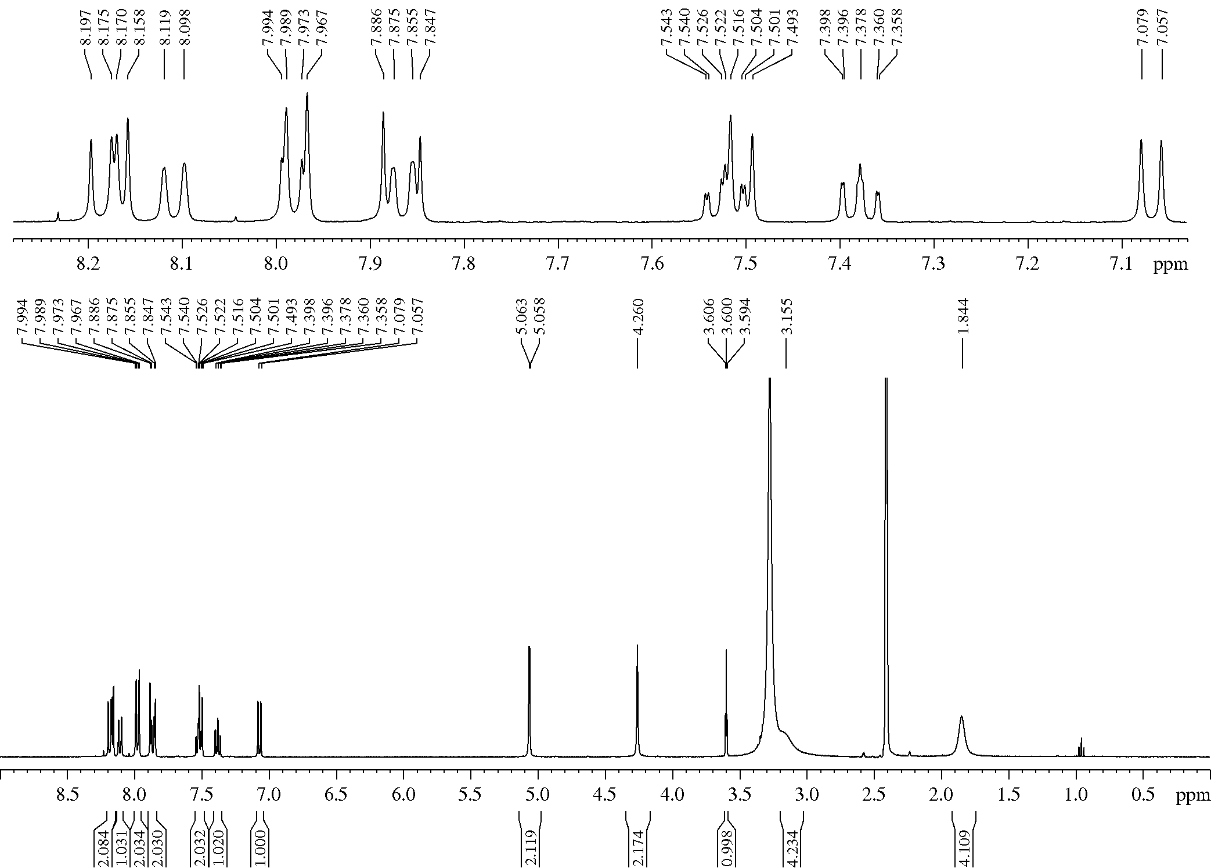


**Figure S16: 1H NMR spectrum of compound 9**

**Figure S17: 13C NMR and DEPT 135 spectra of compound 9**

**Figure S18: Mass spectrum of compound 9**

**Figure S19: 1H NMR spectrum of compound 10**

**Figure S20: 13C NMR and DEPT 135 spectra of compound 10**

**Figure S21: Mass spectrum of compound 10**

**Figure S 22: 1H NMR spectrum of compound 11**

**Figure S 23**:**13C NMR and DEPT 135 spectra of compound 11**

**Figure S 24**: **Mass spectrum of compound 11**

**Figure S 25 1H NMR spectrum of compound 12**

**Figure S 26**:**13C NMR and DEPT 135 spectra of compound 12**

**Figure S 27**: **Mass spectrum of compound 12**

**Figure S 28: 1H NMR spectrum of compound 13**

**Figure S 29**:**13C NMR and DEPT 135 spectra of compound 13**

**Figure S 30**: **Mass spectrum of compound 13**

**Figure S 31: 1H NMR spectrum of compound 14**

**Figure S 32**:**13C NMR and DEPT 135 spectra of compound 14**

**Figure S 33**: **Mass spectrum of compound 14**

**Figure S 34: 1H NMR spectrum of compound 15**

**Figure S 35**:**13C NMR and DEPT 135 spectra of compound 15**

**Figure S 36**: **Mass spectrum of compound 15**

**Figure S 37: 1H NMR spectrum of compound 16**

**Figure S 38**:**13C NMR and DEPT 135 spectra of compound 16**

**Figure S39**: **Mass spectrum of compound 16**

**Table S40**: Binding profiles of the flexible docking results of piperidine derivatives

| Compound | interacting site | Amino acids | Category | Distance |
| --- | --- | --- | --- | --- |
| **(5)** | CAS | SER 200 | Hydrogen Bond | 2.27 |
|  | HIS 440 | Hydrogen Bond | 2.31 |
| The anionic subsite | PHE 330 | Hydrogen Bond | 2.77 |
|  | PHE 330 | Hydrophobic | 4.77 |
|  | TRP 84 | Hydrophobic | 3.95 |
|  | PHE 331 | Hydrophobic | 3.95 |
| **(6)** | PAS | SER122 | Hydrogen Bond | 2.35 |
| The anionic subsite | PHE 330 | Hydrogen Bond | 2.21 |
|  | PHE 330 | Hydrophobic | 5.31 |
|  | TRP 84 | Hydrophobic | 3.85 |
| The oxyanion hole | GLY 117 | Hydrophobic | 3.50 |
| PAS | TYR 70 | Hydrophobic | 5.25 |
|  | TYR 334 | Hydrophobic | 4.33 |
| **(7)** | The oxyanion hole | GLY 118 | Hydrogen Bond | 2.87 |
|  | TYR121 | Hydrogen Bond | 2.65 |
|  | GLU199 | Hydrogen Bond | 2.18 |
| PAS | ASP72 | Hydrophobic | 3.61 |
| CAS | HIS 440 | Hydrophobic | 4.45 |
| The anionic subsite | TRP 84 | Hydrophobic | 5.01 |

**Table S41**: Binding profiles of the flexible docking results of pyrrolidine derivatives

| Chalcone | interacting site | Amino Acid | Distance | Category |
| --- | --- | --- | --- | --- |
|  | The anionic subsite | PHE330 | 1.97 | Hydrogen Bond |
|  |  | PHE330 | 5.32 | Hydrophobic |
| **(8)** |  | TRP84 | 3.85 | Hydrophobic |
|  |  | TRP84 | 4.32 | Hydrophobic |
|  |  | PHE331 | 3.99 | Hydrophobic |
|  | PAS | TYR334 | 5.67 | Hydrophobic |
|  | The acyl pocket | PHE288 | 2.30 | Hydrogen Bond |
|  | The anionic subsite | PHE331 | 2.01 | Hydrogen Bond |
|  |  | PHE331 | 4.83 | Hydrophobic |
|  | PAS | ASP71 | 2.90 | Electrostatic |
| **(9)** |  | ASP72 | 3.77 | Electrostatic |
|  |  | ASP72 | 3.41 | Hydrophobic |
|  |  | TYR334 | 5.18 | Hydrophobic |
|  |  | TYR334 | 5.28 | Hydrophobic |
|  |  | TYR334 | 4.76 | Hydrophobic |
|  |  | TRP279 | 5.28 | Hydrophobic |
|  | The acyl pocket | PHE288 | 1.84 | Hydrogen Bond |
|  | PAS | ASP72 | 3.03 | Electrostatic |
| **(10)** |  | ASP72 | 3.53 | Hydrophobic |
|  |  | TYR334 | 5.05 | Hydrophobic |
|  | The anionic subsite | PHE330 | 4.66 | Hydrophobic |
|  |  | PHE331 | 4.90 | Hydrophobic |

**Table S42**: Binding profiles of the flexible docking results of morpholine derivatives

| Chalcone | interacting site | | Amino Acid | Distance | Category |
| --- | --- | --- | --- | --- | --- |
|  | The anionic subsite | | PHE330 | 2.13 | Hydrogen Bond |
|  |  | | PHE330 | 5.13 | Hydrophobic |
|  |  | | PHE331 | 5.19 | Hydrophobic |
| **(11)** |  | | TRP84 | 3.88 | Hydrophobic |
|  | PAS | | TYR334 | 5.67 | Hydrophobic |
|  |  | | TYR70 | 4.59 | Hydrophobic |
|  |  | | TYR121 | 5.17 | Hydrophobic |
|  | The anionic subsite | | PHE330 | 2.17 | Hydrogen Bond |
|  |  | | PHE330 | 4.98 | Hydrophobic |
| **(12)** |  | | PHE331 | 5.13 | Hydrophobic |
|  |  | | TRP84 | 3.79 | Hydrophobic |
|  | CAS | | HIS440 | 4.73 | Hydrophobic |
|  | PAS | | TYR334 | 5.86 | Hydrophobic |
|  | The acyl pocket | | PHE288 | 1.92 | Hydrogen Bond |
|  | The anionic subsite | | TRP84 | 4.03 | Hydrophobic |
| **(13)** | | PAS | ASP72 | 4.61 | Electrostatic |
|  | |  | TYR334 | 4.61 | Hydrophobic |
|  | |  | TYR121 | 5.55 | Hydrophobic |

**Table S43:** Binding profiles of the flexible docking results of morpholine derivatives

| Chalcone | interacting site | Amino Acid | Distance | Category |
| --- | --- | --- | --- | --- |
|  | The anionic subsite | PHE330 | 2.11 | Hydrogen Bond |
|  |  | PHE330 | 3.92 | Hydrophobic |
| **(14)** |  | TRP84 | 4.04 | Hydrophobic |
|  | PAS | TYR70 | 4.65 | Hydrophobic |
|  |  | TYR121 | 5.11 | Hydrophobic |
|  |  | TRP279 | 5.20 | Hydrophobic |
|  | PAS | TRP279 | 5.06 | Hydrophobic |
|  |  | TYR334 | 4.54 | Hydrophobic |
|  |  | TYR70 | 4.70 | Hydrophobic |
| **(15)** | The anionic subsite | PHE331 | 5.16 | Hydrophobic |
|  |  | PHE330 | 3.74 | Hydrophobic |
|  |  | TRP84 | 3.57 | Hydrophobic |
|  | CAS | HIS440 | 4.46 | Hydrophobic |
|  | PAS | ASP72 | 3.90 | Electrostatic |
|  |  | ASP72 | 3.71 | Hydrophobic |
|  |  | TRP279 | 4.65 | Hydrophobic |
|  |  | TYR334 | 5.77 | Hydrophobic |
| **(16)** |  | TYR121 | 5.36 | Hydrophobic |
|  | The acyl pocket | PHE290 | 5.66 | Hydrophobic |
|  | The anionic subsite | PHE330 | 3.46 | Hydrophobic |
|  |  | TRP84 | 3.53 | Hydrophobic |
|  | CAS | HIS440 | 4.11 | Hydrophobic |
